## ■ CORRESPONDENCE

Anesthesiology  
81:1081, 1994  
© 1994 American Society of Anesthesiologists, Inc.  
J. B. Lippincott Company, Philadelphia

### Cervical Spine Stabilization

*To the Editor:*—We read with interest the article by Hastings and Wood<sup>1</sup> concerning head extension and laryngoscopic view during cervical spine in-line stabilization maneuvers. They state that an assistant may apply axial traction to the head of a patient with known or suspected cervical spine injury to stabilize the head and neck during laryngoscopy. However, in a study of cadavers with unstable cervical spines, axial traction on the cervical spine has been shown to cause significant subluxation as well as distraction and, therefore, cannot be recommended.<sup>2</sup> The degree of movement depends on the direction of the traction and the integrity of the surrounding tissues.

Clearly, further studies are required regarding the airway management of patients with known or suspected cervical spine injury, including effects on neurologic outcome.

**Noor M. Gajraj, M.B., B.S., F.R.C.A.**  
Senior Registrar  
Department of Anaesthesia  
Derbyshire Royal Infirmary  
Derby DE1 2QY  
United Kingdom

Anesthesiology  
81:1081–1082, 1994  
© 1994 American Society of Anesthesiologists, Inc.  
J. B. Lippincott Company, Philadelphia

*In Reply:*—Thank you for the opportunity to respond to Gajraj and Pennant's letter. Although axial traction has been recommended in the past,<sup>3</sup> the possibility that such a maneuver might distract the spinal cord in patients with unstable cervical spines is concerning and is probably the reason that some authorities now recommend that the assistant applying stabilization "attempt to balance the forces exerted by the intubator" rather than apply active axial traction.<sup>1</sup> We do not use axial traction in our clinical practice.<sup>2,3</sup> We did not discuss spinal cord distraction in our paper because the risk is currently only theoretical. Cord distraction has been demonstrated in the cadaver study mentioned by Gajraj and Pennant,<sup>4</sup> and sudden worsening of neurologic deficits has been reported when traction is applied for spine stabilization<sup>5</sup> or to expose C7 on radiographs,<sup>6</sup> but axial traction has never been reported to have an adverse effect on outcome in the setting of direct laryngoscopy. Our study focused on the effects of stabilization maneuvers on the amount of head extension

\* Bagetz MS, Katz JA: Airway management of the trauma patient. *Semin Anesth* 4:114–123, 1985.

**John H. Pennant, M.B., B.S., F.R.C.A.**  
Assistant Professor  
Department of Anesthesiology  
University of Texas Southwestern Medical School  
5323 Harry Hines Boulevard  
Dallas, Texas 75235-9068

#### References

1. Hastings RH, Wood PR: Head extension and laryngeal view during laryngoscopy with cervical spine maneuvers. *ANESTHESIOLOGY* 80:825–831, 1994
2. Bivins HG, Ford S, Bezmalinovic Z, Price HM, Williams JL: The effect of axial traction during orotracheal intubation of the trauma victim with an unstable cervical spine. *Ann Emerg Med* 17:25–29, 1988

(Accepted for publication June 26, 1994.)

necessary to perform direct laryngoscopy. The results suggested that head extension was likely to be minimized when downward immobilization was used in preference to axial traction.

**Randolph H. Hastings, M.D., Ph.D.**  
Assistant Professor of Anesthesiology

**Paul R. Wood, M.D., B.Ch., F.R.C.A.**  
Department of Anesthesiology  
VA Medical Center (125)  
3350 La Jolla Village Drive  
San Diego, California 92161

#### References

1. Suderman VS, Crosby ET, Lui A: Elective oral tracheal intubation in cervical spine injured adults. *Can J Anaesth* 38:785–789, 1991
2. Hastings RH, Marks JD: Airway management for trauma patients with potential cervical spine injuries. *Anesth Analg* 73:471–482, 1991

## CORRESPONDENCE

3. Wood PR, Lawler PGP: A review of the advanced trauma life support protocol. *Anaesthesia* 47:792-797, 1993

4. Bivins HG, Ford S, Bezmalinovic Z, Price HM, Williams JL: The effect of axial traction during orotracheal intubation of the trauma victim with an unstable cervical spine. *Ann Emerg Med* 17:25-29, 1988

5. Fried L: Cervical spinal cord injury during skeletal traction. *JAMA* 229:181-183, 1974

6. Kaufman HH, Harris JH, Spencer JA, Kopanisky DR: Danger of traction during radiography for cervical trauma. *JAMA* 247:2369, 1982

(Accepted for publication June 26, 1994.)

Anesthesiology  
81:1082, 1994  
© 1994 American Society of Anesthesiologists, Inc.  
J. B. Lippincott Company, Philadelphia

## When Is Ethnicity Relevant in a Case Report?

*To the Editor:*—With reference to a recently published case report of a 29-yr-old woman with a bronchial trifurcation at the carina, we fail to understand the medical or epidemiologic relevance of describing the patient as "Hispanic".<sup>1</sup> The term Hispanic refers to a cultural group, not a racial group. Hispanics may be white, black, Asian, or any other race.<sup>2</sup> The 1990 Census considers persons to be of Spanish/Hispanic origin if the person's origin or ancestry is Mexican, Mexican-American, Chicano, Puerto Rican, Cuban, Argentinean, Colombian, Costa Rican, Dominican, Ecuadorian, Guatemalan, Honduran, Nicaraguan, Peruvian, Salvadoran; from other Spanish-speaking countries of the Caribbean or Central or South America; or from Spain.<sup>3</sup> In fact, the only real prerequisite for being Hispanic is self-identification. For federal data collection purposes, Hispanic persons are those who say they are Hispanic. A large number of Hispanics in the United States are bilingual. Thus, this classification does not necessarily mean that the individual cannot speak English. The term Hispanic has caused controversy in the past and has been associated with derogatory remarks. A number of alternative terms have been used by Hispanic-Americans to name themselves, including Spanish or Latino.

Our comments should not be interpreted as excessive sensitivity nor to suggest that the term "Hispanic" should not be used. We

suggest avoiding labeling patients in a scientific publication, unless the description adds relevant, pertinent, and useful information.

**Rafael Ortega, M.D.**  
Assistant Professor of Anesthesiology

**Marcelle M. Willock, M.D.**  
Professor and Chairman

Department of Anesthesiology  
Boston University Medical Center  
88 East Newton Street  
Boston, Massachusetts 02118

### References

1. Stene R, Rose M, Weinger MB, Benumof JL, Harrell J: Bronchial trifurcation at the carina complicating use of a double-lumen tracheal tube. *ANESTHESIOLOGY* 80:1162-1164, 1994
2. Garwood AN: *Hispanic Americans: A Statistical Sourcebook*. Boulder, Numbers and Concepts, 1991
3. Schick FL, Schick R: *Statistical Handbook on U.S. Hispanics*. Phoenix, The Oryx Press, 1991

(Accepted for publication June 26, 1994.)

Anesthesiology  
81:1082, 1994  
© 1994 American Society of Anesthesiologists, Inc.  
J. B. Lippincott Company, Philadelphia

*In Reply:*—Ortega and Willock make several excellent and thoughtful points. The use of the adjective "Hispanic" has no useful medical or epidemiologic purpose in our article<sup>1</sup> that I know of. I thank Ortega and Willock for their culturally sensitive comments.

**Jonathan L. Benumof, M.D.**  
Professor of Anesthesia  
Department of Anesthesiology, 0801  
University of California, San Diego

9500 Gilman Drive  
La Jolla, California 92093-0801

### Reference

1. Stene R, Rose M, Weinger MB, Benumof JL, Harrell J: Bronchial trifurcation at the carina complicating use of a double-lumen tracheal tube. *ANESTHESIOLOGY* 80:1162-1164, 1994

(Accepted for publication June 27, 1994.)
